# Supplementary material
Source: publisher figshare collection journal article supplement (https://acs.figshare.com/ndownloader/files/4178593)
Supplement: Supplementary file 1 [file 4178593]

# Evaluation of Stable Isotope Tracing for ZnO Nanomaterials – New constraints from high precision isotope analyses and modelling.

*Fiona Larner and Mark Rehkämper*

## **Supplementary Material**

File A: 1 MS Excel Spreadsheet

File B: 2 pages, Tables S1 and S2.
